# Supplementary material
Source: publisher figshare collection journal article supplement (https://karger.figshare.com/ndownloader/files/8715037)
Supplement: Supplementary file 1 [file 8715037]

Table 4: Patient distribution to post-acute care pathways

| **Pathway** | **Selection in the PMSI** | | **Source** |
| --- | --- | --- | --- |
| **Pathway A**  **(Discharge home)** | | Type of discharge = ‘Home’ | - |
| **Pathway B**  **(Rehabilitative care facility then home)** | | 77% of discharges = ‘Transfer to rehabilitative care facility / domiciliary hospitalization / short-term care / psychiatric care’ | Fery-Lemonnier report [3], Appendix 11, pA88 |
| **Pathway C**  **(Rehabilitative then nursing care facilities)** | | 6% of discharges = ‘Transfer to rehabilitative care facility / domiciliary hospitalization / short-term care / psychiatric care’ | Fery-Lemonnier report [3], Appendix 11, pA88 |
| **Pathway D**  **(Long-term care facility)** | | Type of discharge = ‘Transfer to long-term care facility’  +  17% of discharges = ‘Transfer to rehabilitative care facility / domiciliary hospitalization / short-term care / psychiatric care’ | Fery-Lemonnier report [3], Appendix 11, pA88 |
| **Pathway E**  **(Death)** | | Type of discharge = ‘Death’ | - |

Table 5: Key base case values and hypotheses and corresponding lower and upper bounds

| **Pathway** | **Resource consumed** | **% de patients concerned** | **Unit** | | | **Valuation method** | **Unit cost** | | |
| --- | --- | --- | --- | --- | --- | --- | --- | --- | --- |
| **Lower bound** | **Base case value** | **Upper bound** | **Lower bound** | **Base case value** | **Upper bound** |
| **A** | Botulinum toxin injection | 40% (hypothesis) | 0 every 3 months | 1 every 3 months | 3 per year | ENC 2011 cost for the DRG no. 197 « Botulinum toxin injection, in the ambulatory setting » | €309.55  / inj. | €480.52  / inj. | €480.52  / inj. |
| *source : expert opinion (9)* | | |
| **A** | PRM session | 50% (hypothesis) | 3 per week during 3 weeks | 4 per week during 4 weeks | 5 per week during 5 weeks | Median charge for reimbursement from 2013 in outpatient care for a sample of institutions | €151.54  / sess. | €195.25  / sess. | €321.50  / sess. |
| *source : Yelnik et al. 2011 (8)* | | |
| **A** | Physical therapy session | 50% (hypothesis) | 3 per week during 4 weeks | 4 per week during 8 weeks | 5 per week during 12 weeks | Median charge for reimbursement from 2013 for physical therapy for neurologic conditions | €21.20  / sess. | €24.43  / sess. | €27.65  / sess. |
| *source : Yelnik et al. 2011 (8)* | | |
| **A** | Speech therapy session | 50% (hypothesis) | 3 per week during 4 weeks | 4 per week during 8 weeks | 5 per week during 12 weeks | Median charge for reimbursement from 2013 for speech therapy sessions for rehabilitation following stroke | €30.00  / sess. | €35.25  / sess. | €40.75  / sess. |
| *source : Yelnik et al. 2011 (6)* | | |
| **A** | Follow-up visit with a neurologist | 100% (hypothesis) | 1 consultation | 2  consultations | 3 consultations | Charge for reimbursement by the national health insurance from 2013 | €43.70  / cons. | €43.70  / cons. | €43.70  / cons. |
| *source : Yelnik et al. 2011 (8)* | | |
| **B** | Botulinum toxin injection | 40% (hypothesis) | 0 every 3 months | 1 every 3 months | 3 per year | ENC 2011 cost for the DRG no. 197 « Botulinum toxin injection, in the ambulatory setting » | €309.55  / inj. | €480.52  / inj. | €480.52  / inj. |
| *source : expert opinion (9)* | | |
| **B** | Stay in a rehabilitative care facility | - | 30 days | 90 days | 120 days | ENC cost for the stroke DRG in 2010  (median of private and public sector costs) | €160.88  / day | €288.01  / day | €443.12  / day |
| *source : Yelnik et al. 2011 (8)* | | |
| **B** | PRM session | 50% (hypothesis) | 3 per week during 4 weeks | 4 per week during 8 weeks | 5 per week during 12 weeks | Median charge for reimbursement from 2013 in outpatient care for a sample of institutions | €151.5  / sess. | €195.25  / sess. | €321.50  / sess. |
| *source : Yelnik et al. 2011 (8)* | | |
| **B** | Speech therapy session | 50% (hypothesis) | 2 per week during 32 weeks | 3 per week during 40 weeks | 4 per week during 44 weeks | Median charge for reimbursement from 2013 for speech therapy sessions for rehabilitation following stroke | €30.00  / sess. | €35.25  / sess. | €40.75  / sess. |
| *source : Yelnik et al. 2011 (8)* | | |
| **C** | Botulinum toxin injection | 40% (hypothesis) | 0 every 3 months | 1 every 3 months | 3 per year | ENC 2011 cost for the DRG no. 197 « Botulinum toxin injection, in the ambulatory setting » | €309.55  / inj. | €480.52  / inj. | €480.52  / inj. |
| *source : expert opinion (9)* | | |
| **C** | Stay in a rehabilitative care facility | - | 60 days | 120 days | 180 days | ENC cost for the stroke DRG in 2010  (median of private and public sector costs) | €160.88  / day | €288.01  / day | €443.12  / day |
| *source : Yelnik et al. 2011 (8)* | | |
| **C** | Stay in a nursing home | - | 185 days | 245 days | 305 days | Median charge for reimbursement from 2013 for a disability group average of 3 or 4 for a sample of institutions | €69.79  / day | €106.54  / day | €155.01  / day |
| *source : Yelnik et al. 2011 (8)* | | |
| **C** | PRM session | 100% (hypothesis) | 3 per week during 4 weeks | 4 per week during 8 weeks | 5 per week during 12 weeks | Median charge for reimbursement from 2013 in outpatient care for a sample of institutions | €151.54  / sess. | €195.25  / sess. | €321.50  / sess. |
| *source : Yelnik et al. 2011 (8)* | | |
| **D** | Stay in a rehabilitative care facility | - | 0 days | 120 days | 365 days | ENC cost for the stroke DRG in 2010  (median of private and public sector costs) | €160.88  / day | €288.01  / day | €443.12  / day |
| *source : Yelnik et al. 2011 (8)* | | |
| **D** | Stay in a long-term care facility | - | 0 days | 245 days | 365 days | Median charge for reimbursement from 2013 for a sample of institutions | €92.26  / day | €145.70  / day | €198.21  / day |
| *source : Yelnik et al. 2011 (8)* | | |
